# Supplementary material for: Gene Network Disruptions and Neurogenesis Defects in the Adult Ts1Cje Mouse Model of Down Syndrome
Source: PLoS One. 2010 Jul 16;5(7):e11561. doi: 10.1371/journal.pone.0011561 (PMC2905390; doi:10.1371/journal.pone.0011561)
Supplement: Table S2 — Affymetrix and RT-qPCR data. (0.03 MB XLS) [file pone.0011561.s003.xls]

## Sheet: Sheet1
Supplementary Table 2: Affymetrix and RT-qPCR data
	Affymetrix Results						RT-PCR Results
Gene Symbol	Affymetrix Probe Set ID	Disomic log Intensity	Ts1Cje log Intensity	log2 Fold-Change	t-statistic	P Value	Disomic log Expression	Ts1Cje log Expression	log2 Fold-Change	t-statistic	P Value
Aurka	1424511_at	8.98835	8.03855	-0.949796	-4.26136	0.00698967	-0.0411111	-0.326667	-0.285556	-1.29875	0.216312
Brca2	1419076_a_at	7.78447	7.01659	-0.767886	-7.81094	0.000416524	-2.53111	-3.10667	-0.575556	-1.74297	0.104626
Ccna2	1417911_at	9.16701	8.39461	-0.772398	-4.41335	0.00601291	1.69667	1.24667	-0.45	-1.41195	0.181157
Ccnb1	1419943_s_at	10.7621	10.0382	-0.723839	-4.61902	0.00493037	0.0555556	-0.196667	-0.252222	-1.14171	0.27391
Cenpo	1418542_s_at	6.50863	6.03345	-0.475176	-6.11833	0.00136147	-3.84111	-4.31333	-0.472222	-1.96995	0.070246
Itsn1	1425899_a_at	6.5559	7.14244	0.586545	4.43888	0.00586467	1.26556	1.51	0.244444	0.852802	0.409013
Mcm7	1439269_x_at	9.779	8.89797	-0.881035	-4.94239	0.00365057	-0.0833333	-0.6	-0.516667	-2.19307	0.0468418
Mcm7	1416030_a_at	10.8803	9.78006	-1.10024	-4.99682	0.00347517
Mcm7	1416031_s_at	10.1511	9.11645	-1.03465	-5.28197	0.00270117
Mcm7	1438320_s_at	12.2972	11.5713	-0.725964	-6.33378	0.00115478
Pbk	1448627_s_at	12.3464	11.7771	-0.569357	-4.27099	0.00692267	-1.63333	-1.79667	-0.163333	-0.68644	0.504345
Phb	1448563_at	8.70875	8.9814	0.272648	5.0353	0.003357	0.532222	0.5	-0.0322222	-0.139533	0.891141
Prim1	1449061_a_at	9.59324	8.87762	-0.715624	-4.13491	0.00794239	-1.97667	-2.48444	-0.507778	-2.04332	0.0615645
Suv39h1	1427382_a_at	8.95309	8.5973	-0.355791	-8.01282	0.000367069	2.47556	2.06	-0.415556	-1.49263	0.159102
